# Supplementary material
Source: PubMed Central journal article supplement (PMC3256331)
Supplement: epi0612_1413SD1.pdf [file epi0612_1413SD1.pdf]

## Supplementary material 1

**Table 1.** Relative quantification of drug induced gene re-expression in the independent biological replicas (indicated by numbers 1 and 2). The qPCR assays were performed in a StepOne Real-time PCR System (Applied Biosystems) and the results were calculated using the  $\Delta\Delta C_t$ -method normalized to glyceraldehyde-3-phosphate dehydrogenase (*GAPDH*) expression levels. For each gene and cell line, the results are expressed as fold change relative to the respective reference (untreated controls).

RELATIVE EXPRESSION LEVELS (FOLD CHANGE)

| CELL LINES<br>GENES and<br>treatments | 184A1          | 184B5 | BT-20 | BT-474 | BT-483 | BT-549 | Hs 578T | MCF 10A | MCF7  | MDA-MB-<br>134-IV | MDA-<br>MB-231 | MDA-<br>MB-361 | MDA-<br>MB-415 | MDA-<br>MB-436 | MDA-<br>MB-453 | MDA-<br>MB-468 | SK-BR-3 | T-47D | ZR-75-30 | ZR-75-1 |
|---------------------------------------|----------------|-------|-------|--------|--------|--------|---------|---------|-------|-------------------|----------------|----------------|----------------|----------------|----------------|----------------|---------|-------|----------|---------|
|                                       | <b>SEMAB3B</b> |       |       |        |        |        |         |         |       |                   |                |                |                |                |                |                |         |       |          |         |
| Reference<br>(untreated cell line)    | 1.00           | 1.00  | 1.00  | 1.00   | 1.00   | 1.00   | 1.00    | 1.00    | 1.00  | 1.00              | 1.00           | 1.00           | 1.00           | 1.00           | 1.00           | 1.00           | 1.00    | 1.00  | 1.00     | 1.00    |
| 5-Aza-dC 1                            | 2.61           | 0.88  | 0.98  | 3.63   | 3.08   | 1.08   | 1.33    | 0.73    | 7.43  | 1.69              | 0.34           | 3.50           | 2.14           | 1.22           | 5.82           | 1.68           | 3.92    | 1.35  | 0.43     | 10.39   |
| 5-Aza-dC 2                            | 3.06           | 1.03  | 1.18  | 5.64   | 2.44   | 1.18   | 1.62    | 0.77    | 3.45  | 1.47              | 0.34           | 3.93           | 2.60           | 2.29           | 7.72           | 1.78           | 2.24    | 1.33  | 0.54     | 10.14   |
| TSA 1                                 | 0.46           | 1.08  | 0.15  | 1.43   | 1.11   | 1.25   | 1.34    | 0.66    | 0.92  | 1.12              | 0.47           | 1.11           | 0.68           | 1.20           | 2.19           | 0.70           | 20.91   | 1.06  | 0.44     | 1.45    |
| TSA 2                                 | 0.68           | 1.29  | 0.15  | 1.65   | 1.08   | 0.93   | 1.47    | 0.66    | 1.13  | 0.76              | 0.43           | 1.13           | 0.71           | 1.27           | 1.95           | 0.83           | 46.53   | 1.10  | 0.14     | 1.38    |
| 5-Aza-dC+TSA 1                        | 1.39           | 1.18  | 1.65  | 3.22   | 2.91   | 1.28   | 1.79    | 0.71    | 3.82  | 0.86              | 0.66           | 4.85           | 1.83           | 2.35           | 6.88           | 2.50           | 3.61    | 1.79  | 0.90     | 5.13    |
| 5-Aza-dC+TSA 2                        | 1.38           | 1.07  | 1.23  | 3.13   | 2.85   | 1.46   | 1.49    | 0.64    | 3.32  | 1.31              | 0.72           | 5.63           | 2.11           | 1.74           | 5.33           | 2.16           | 2.04    | 1.74  | 0.65     | 5.46    |
| <b>HYAL3</b>                          |                |       |       |        |        |        |         |         |       |                   |                |                |                |                |                |                |         |       |          |         |
| Reference<br>(untreated cell line)    | 1.00           | 1.00  | 1.00  | 1.00   | 1.00   | 1.00   | 1.00    | 1.00    | 1.00  | 1.00              | 1.00           | 1.00           | 1.00           | 1.00           | 1.00           | 1.00           | 1.00    | 1.00  | 1.00     | 1.00    |
| 5-Aza-dC 1                            | 1.09           | 2.54  | 1.15  | 1.25   | 1.15   | 2.17   | 1.52    | 1.87    | 1.13  | 0.88              | 3.68           | 2.02           | 1.65           | 1.70           | 1.96           | 1.87           | 1.61    | 1.36  | 0.72     | 4.38    |
| 5-Aza-dC 2                            | 1.21           | 2.51  | 1.23  | 1.78   | 1.24   | 1.96   | 1.54    | 1.55    | 1.01  | 1.14              | 4.40           | 2.84           | 1.78           | 2.27           | 1.90           | 2.10           | 1.17    | 1.24  | 0.71     | 3.21    |
| TSA 1                                 | 0.95           | 1.78  | 0.32  | 1.41   | 0.99   | 1.30   | 1.17    | 1.34    | 0.67  | 1.49              | 1.54           | 1.83           | 0.69           | 1.23           | 1.03           | 0.81           | 2.65    | 0.91  | 1.63     | 1.06    |
| TSA 2                                 | 0.93           | 0.86  | 0.84  | 1.04   | 0.90   | 1.09   | 1.24    | 1.15    | 0.75  | 0.77              | 1.10           | 1.58           | 0.69           | 1.08           | 1.15           | 0.96           | 1.14    | 0.89  | 1.15     | 0.73    |
| 5-Aza-dC+TSA 1                        | 1.17           | 2.68  | 1.04  | 5.04   | 1.05   | 2.51   | 2.07    | 2.83    | 0.94  | 0.86              | 3.35           | 2.78           | 1.41           | 1.83           | 4.26           | 1.91           | 1.55    | 1.11  | 1.07     | 1.98    |
| 5-Aza-dC+TSA 2                        | 0.90           | 2.53  | 1.20  | 3.67   | 0.93   | 2.30   | 1.99    | 2.11    | 1.06  | 0.99              | 3.13           | 3.26           | 1.37           | 1.99           | 1.32           | 1.82           | 0.98    | 1.01  | 1.27     | 1.12    |
| <b>HYAL1</b>                          |                |       |       |        |        |        |         |         |       |                   |                |                |                |                |                |                |         |       |          |         |
| Reference<br>(untreated cell line)    | 1.00           | 1.00  | 1.00  | 1.00   | 1.00   | 1.00   | 1.00    | 1.00    | 1.00  | 1.00              | 1.00           | 1.00           | 1.00           | 1.00           | 1.00           | 1.00           | 1.00    | 1.00  | 1.00     | 1.00    |
| 5-Aza-dC 1                            | 124.26         | 63.79 | 7.01  | 5.44   | 25.65  | 55.66  | 5.57    | 84.38   | 30.69 | 12.33             | 7.77           | 21.49          | 2.37           | 17.27          | 89.89          | 5.62           | 11.24   | 8.47  | 3.58     | 32.07   |
| 5-Aza-dC 2                            | 127.88         | 61.85 | 7.91  | 5.29   | 23.73  | 54.26  | 5.71    | 98.07   | 31.01 | 7.50              | 6.88           | 25.44          | 2.36           | 14.43          | 49.05          | 8.16           | 3.27    | 8.63  | 3.35     | 27.76   |
| TSA 1                                 | 1.23           | 0.92  | 1.73  | 3.94   | 0.63   | 1.61   | 1.19    | 0.44    | 2.05  | 1.59              | 5.11           | 0.96           | 0.53           | 0.58           | 1.17           | 2.42           | 10.65   | 1.52  | 1.65     | 0.62    |
| TSA 2                                 | 1.21           | 1.21  | 1.47  | 2.85   | 1.42   | 1.46   | 0.89    | 0.77    | 1.66  | 1.83              | 1.10           | 0.63           | 0.53           | 0.63           | 0.97           | 4.15           | 1.00    | 1.46  | 2.89     | 0.43    |
| 5-Aza-dC+TSA 1                        | 126.63         | 58.89 | 8.10  | 58.57  | 58.45  | 43.26  | 7.67    | 106.79  | 41.77 | 8.89              | 6.67           | 22.75          | 1.32           | 26.94          | 142.25         | 6.93           | 13.80   | 9.01  | 4.22     | 20.37   |
| 5-Aza-dC+TSA 2                        | 68.82          | 44.35 | 8.28  | 29.82  | 46.30  | 39.88  | 6.79    | 106.01  | 36.88 | 15.84             | 6.75           | 34.29          | 1.96           | 25.75          | 44.03          | 12.34          | 2.65    | 7.02  | 3.72     | 15.81   |
| <b>HYAL2</b>                          |                |       |       |        |        |        |         |         |       |                   |                |                |                |                |                |                |         |       |          |         |
| Reference<br>(untreated cell line)    | 1.00           | 1.00  | 1.00  | 1.00   | 1.00   | 1.00   | 1.00    | 1.00    | 1.00  | 1.00              | 1.00           | 1.00           | 1.00           | 1.00           | 1.00           | 1.00           | 1.00    | 1.00  | 1.00     | 1.00    |
| 5-Aza-dC 1                            | 1.21           | 1.37  | 1.18  | 1.19   | 1.19   | 1.41   | 1.29    | 2.29    | 1.83  | 1.31              | 1.35           | 1.03           | 1.24           | 0.51           | 1.99           | 1.05           | 1.71    | 1.48  | 0.61     | 1.58    |
| 5-Aza-dC 2                            | 1.28           | 1.33  | 1.25  | 1.11   | 1.27   | 1.36   | 1.33    | 1.99    | 1.74  | 1.24              | 1.50           | 1.17           | 1.37           | 0.70           | 1.68           | 0.98           | 1.10    | 1.45  | 0.66     | 1.15    |
| TSA 1                                 | 0.98           | 1.03  | 1.84  | 1.07   | 0.97   | 1.27   | 1.29    | 1.24    | 1.01  | 1.34              | 1.04           | 0.89           | 0.72           | 0.79           | 1.16           | 1.22           | 1.78    | 1.33  | 0.69     | 0.71    |
| TSA 2                                 | 0.68           | 1.00  | 1.35  | 1.09   | 0.80   | 1.23   | 1.22    | 1.08    | 0.95  | 1.02              | 0.82           | 0.91           | 0.71           | 0.72           | 1.20           | 1.00           | 1.56    | 1.17  | 0.71     | 0.56    |

|                                 |      |      |      |       |      |      |      |      |      |      |      |      |      |      |      |      |       |      |      |      |
|---------------------------------|------|------|------|-------|------|------|------|------|------|------|------|------|------|------|------|------|-------|------|------|------|
| 5-Aza-dC+TSA 1                  | 1.38 | 1.24 | 1.38 | 1.28  | 1.33 | 1.26 | 1.77 | 2.22 | 1.37 | 0.51 | 1.67 | 0.91 | 0.84 | 0.62 | 2.50 | 1.13 | 1.49  | 1.80 | 0.69 | 1.22 |
| 5-Aza-dC+TSA 2                  | 0.71 | 1.26 | 1.98 | 1.10  | 1.49 | 1.40 | 1.92 | 2.20 | 1.53 | 0.83 | 1.65 | 0.67 | 1.05 | 0.49 | 1.37 | 1.03 | 1.77  | 1.66 | 0.58 | 1.65 |
| <b>TUSC2</b>                    |      |      |      |       |      |      |      |      |      |      |      |      |      |      |      |      |       |      |      |      |
| Reference (untreated cell line) | 1.00 | 1.00 | 1.00 | 1.00  | 1.00 | 1.00 | 1.00 | 1.00 | 1.00 | 1.00 | 1.00 | 1.00 | 1.00 | 1.00 | 1.00 | 1.00 | 1.00  | 1.00 | 1.00 | 1.00 |
| 5-Aza-dC 1                      | 1.14 | 2.09 | 1.06 | 1.67  | 1.35 | 1.55 | 1.78 | 3.86 | 1.43 | 1.44 | 2.01 | 1.32 | 1.87 | 1.60 | 1.91 | 1.40 | 2.16  | 1.83 | 0.70 | 2.75 |
| 5-Aza-dC 2                      | 0.98 | 2.62 | 0.92 | 2.28  | 1.18 | 1.44 | 1.71 | 3.56 | 1.67 | 1.49 | 3.92 | 1.47 | 2.09 | 2.36 | 1.65 | 1.84 | 2.32  | 1.82 | 0.98 | 2.88 |
| TSA 1                           | 0.94 | 1.07 | 0.00 | 1.62  | 1.18 | 1.15 | 2.26 | 0.77 | 1.14 | 1.36 | 1.22 | 0.91 | 0.91 | 0.84 | 1.23 | 0.15 | 1.74  | 1.12 | 2.85 | 2.24 |
| TSA 2                           | 0.59 | 1.01 | 0.00 | 1.45  | 0.91 | 0.90 | 2.33 | 1.07 | 0.94 | 1.13 | 0.67 | 0.85 | 0.96 | 1.25 | 1.21 | 0.76 | 1.26  | 1.27 | 2.51 | 2.33 |
| 5-Aza-dC+TSA 1                  | 1.48 | 2.61 | 0.97 | 2.12  | 1.06 | 1.36 | 4.32 | 3.78 | 1.04 | 0.51 | 3.14 | 2.08 | 1.89 | 2.91 | 1.54 | 2.75 | 1.92  | 2.18 | 0.92 | 2.91 |
| 5-Aza-dC+TSA 2                  | 0.43 | 2.37 | 1.15 | 1.69  | 1.10 | 1.30 | 3.77 | 3.78 | 1.04 | 0.77 | 1.24 | 1.68 | 1.62 | 2.23 | 0.62 | 0.70 | 2.27  | 2.09 | 0.72 | 2.24 |
| <b>RASSF1</b>                   |      |      |      |       |      |      |      |      |      |      |      |      |      |      |      |      |       |      |      |      |
| Reference (untreated cell line) | 1.00 | 1.00 | 1.00 | 1.00  | 1.00 | 1.00 | 1.00 | 1.00 | 1.00 | 1.00 | 1.00 | 1.00 | 1.00 | 1.00 | 1.00 | 1.00 | 1.00  | 1.00 | 1.00 | 1.00 |
| 5-Aza-dC 1                      | 0.92 | 1.35 | 1.97 | 1.17  | 1.29 | 0.93 | 2.10 | 2.82 | 3.08 | 1.11 | 2.80 | 1.52 | 0.81 | 3.13 | 1.99 | 2.22 | 2.43  | 2.50 | 0.55 | 1.92 |
| 5-Aza-dC 2                      | 0.86 | 1.35 | 2.22 | 1.84  | 1.24 | 0.93 | 2.09 | 2.72 | 1.93 | 1.23 | 3.18 | 3.01 | 0.97 | 4.00 | 2.86 | 5.54 | 2.34  | 2.45 | 0.54 | 1.56 |
| TSA 1                           | 0.86 | 1.09 | 1.15 | 1.34  | 0.90 | 1.56 | 1.61 | 1.58 | 0.99 | 1.29 | 1.80 | 1.24 | 0.67 | 0.84 | 1.13 | 1.17 | 2.46  | 1.55 | 0.38 | 0.85 |
| TSA 2                           | 0.61 | 1.29 | 1.38 | 0.95  | 0.72 | 1.03 | 1.36 | 1.24 | 0.89 | 0.79 | 1.21 | 0.99 | 0.67 | 0.83 | 1.03 | 1.02 | 1.56  | 1.30 | 0.43 | 0.88 |
| 5-Aza-dC+TSA 1                  | 0.99 | 1.77 | 1.38 | 0.87  | 1.02 | 0.89 | 3.27 | 3.09 | 1.30 | 0.56 | 4.33 | 1.24 | 0.59 | 7.46 | 2.22 | 6.77 | 3.68  | 1.67 | 0.78 | 1.14 |
| 5-Aza-dC+TSA 2                  | 0.34 | 1.69 | 1.86 | 0.77  | 0.93 | 0.80 | 3.23 | 2.80 | 1.32 | 0.58 | 2.50 | 2.62 | 0.79 | 5.29 | 2.22 | 4.20 | 1.90  | 1.25 | 0.69 | 1.61 |
| <b>ZMYND10</b>                  |      |      |      |       |      |      |      |      |      |      |      |      |      |      |      |      |       |      |      |      |
| Reference (untreated cell line) | 1.00 | 1.00 | 1.00 | 1.00  | 1.00 | 1.00 | 1.00 | 1.00 | 1.00 | 1.00 | 1.00 | 1.00 | 1.00 | 1.00 | 1.00 | 1.00 | 1.00  | 1.00 | 1.00 | 1.00 |
| 5-Aza-dC 1                      | 0.96 | 1.11 | 1.54 | 4.55  | 1.13 | 0.92 | 1.51 | 1.01 | 0.99 | 0.43 | 1.66 | 2.51 | 1.59 | 5.23 | 1.27 | 0.74 | 3.37  | 1.28 | 0.76 | 1.88 |
| 5-Aza-dC 2                      | 1.03 | 1.70 | 1.61 | 7.64  | 1.28 | 0.93 | 1.53 | 0.90 | 0.97 | 0.16 | 1.32 | 2.34 | 1.77 | 7.66 | 1.29 | 0.82 | 3.02  | 1.27 | 0.80 | 2.12 |
| TSA 1                           | 0.62 | 0.23 | 1.46 | 12.36 | 0.91 | 0.98 | 1.43 | 1.14 | 0.76 | 0.58 | 2.29 | 1.53 | 0.92 | 0.72 | 1.33 | 1.26 | 5.40  | 1.20 | 4.73 | 1.57 |
| TSA 2                           | 0.55 | 0.29 | 1.63 | 24.73 | 0.79 | 1.06 | 1.62 | 0.97 | 0.64 | 1.00 | 1.86 | 1.59 | 0.91 | 1.26 | 1.27 | 1.30 | 1.45  | 1.22 | 5.29 | 1.43 |
| 5-Aza-dC+TSA 1                  | 0.86 | 1.88 | 1.13 | 56.26 | 0.67 | 0.53 | 2.07 | 1.29 | 0.57 | 0.59 | 2.11 | 2.05 | 1.17 | 8.91 | 1.17 | 2.50 | 3.79  | 0.71 | 2.01 | 2.69 |
| 5-Aza-dC+TSA 2                  | 0.54 | 1.27 | 1.10 | 47.86 | 0.50 | 0.59 | 1.95 | 1.29 | 0.62 | 0.76 | 2.08 | 2.57 | 0.78 | 6.00 | 0.89 | 2.02 | 1.64  | 1.00 | 1.02 | 2.30 |
| <b>NPRL2</b>                    |      |      |      |       |      |      |      |      |      |      |      |      |      |      |      |      |       |      |      |      |
| Reference (untreated cell line) | 1.00 | 1.00 | 1.00 | 1.00  | 1.00 | 1.00 | 1.00 | 1.00 | 1.00 | 1.00 | 1.00 | 1.00 | 1.00 | 1.00 | 1.00 | 1.00 | 1.00  | 1.00 | 1.00 | 1.00 |
| 5-Aza-dC 1                      | 0.87 | 1.20 | 1.13 | 1.57  | 0.98 | 0.85 | 1.57 | 1.21 | 2.31 | 1.12 | 1.39 | 1.01 | 1.28 | 2.14 | 1.66 | 1.22 | 33.01 | 1.03 | 0.83 | 2.63 |
| 5-Aza-dC 2                      | 0.86 | 1.14 | 1.06 | 1.91  | 0.92 | 0.93 | 1.34 | 1.72 | 1.68 | 0.95 | 1.38 | 1.21 | 1.41 | 2.62 | 1.55 | 1.34 | 1.78  | 1.16 | 1.26 | 2.70 |
| TSA 1                           | 0.96 | 1.25 | 1.29 | 1.18  | 0.80 | 1.18 | 1.24 | 1.12 | 1.10 | 1.23 | 0.97 | 0.97 | 0.83 | 1.14 | 1.29 | 1.15 | 4.30  | 0.96 | 2.89 | 2.52 |
| TSA 2                           | 0.58 | 0.95 | 1.06 | 1.10  | 0.78 | 1.02 | 0.89 | 1.05 | 0.85 | 0.99 | 1.04 | 0.87 | 0.82 | 1.34 | 1.43 | 1.19 | 1.46  | 1.16 | 2.45 | 2.25 |
| 5-Aza-dC+TSA 1                  | 0.90 | 1.41 | 1.99 | 2.23  | 0.76 | 1.01 | 1.22 | 1.56 | 1.36 | 0.99 | 1.08 | 2.01 | 1.36 | 2.84 | 1.82 | 1.82 | 3.13  | 1.49 | 0.95 | 2.05 |
| 5-Aza-dC+TSA 2                  | 0.82 | 1.43 | 1.99 | 1.81  | 0.77 | 0.89 | 1.23 | 1.14 | 1.47 | 1.03 | 1.13 | 1.48 | 1.45 | 2.76 | 1.34 | 1.77 | 1.70  | 1.55 | 1.00 | 1.50 |
| <b>TMEM115</b>                  |      |      |      |       |      |      |      |      |      |      |      |      |      |      |      |      |       |      |      |      |

|                                    |       |       |      |      |      |       |      |       |       |      |       |      |      |      |      |       |       |      |      |      |
|------------------------------------|-------|-------|------|------|------|-------|------|-------|-------|------|-------|------|------|------|------|-------|-------|------|------|------|
| Reference<br>(untreated cell line) | 1.00  | 1.00  | 1.00 | 1.00 | 1.00 | 1.00  | 1.00 | 1.00  | 1.00  | 1.00 | 1.00  | 1.00 | 1.00 | 1.00 | 1.00 | 1.00  | 1.00  | 1.00 | 1.00 | 1.00 |
| 5-Aza-dC 1                         | 1.04  | 1.26  | 1.07 | 1.23 | 1.15 | 1.00  | 1.12 | 1.17  | 12.12 | 1.21 | 1.40  | 1.66 | 1.63 | 1.03 | 1.54 | 2.05  | 1.18  | 2.12 | 0.58 | 2.25 |
| 5-Aza-dC 2                         | 1.08  | 1.29  | 1.08 | 1.46 | 1.18 | 1.03  | 1.12 | 1.17  | 7.41  | 1.15 | 2.67  | 1.80 | 1.42 | 1.65 | 2.30 | 2.11  | 0.93  | 1.82 | 0.46 | 2.08 |
| TSA 1                              | 1.00  | 1.34  | 0.80 | 1.92 | 0.98 | 1.16  | 1.06 | 0.81  | 36.00 | 1.04 | 1.16  | 1.28 | 0.94 | 0.84 | 1.15 | 1.10  | 1.90  | 1.62 | 0.77 | 2.13 |
| TSA 2                              | 0.97  | 1.11  | 0.85 | 1.66 | 0.98 | 1.09  | 0.87 | 1.04  | 6.63  | 1.17 | 1.16  | 1.04 | 0.93 | 0.99 | 1.25 | 1.10  | 0.78  | 1.63 | 0.57 | 1.84 |
| 5-Aza-dC+TSA 1                     | 1.10  | 1.56  | 1.23 | 2.37 | 1.21 | 1.22  | 1.08 | 1.24  | 5.43  | 1.00 | 1.39  | 1.85 | 1.65 | 1.73 | 1.89 | 2.51  | 2.23  | 3.22 | 0.54 | 2.84 |
| 5-Aza-dC+TSA 2                     | 0.96  | 1.44  | 1.31 | 2.08 | 1.18 | 1.13  | 1.11 | 1.28  | 2.41  | 1.22 | 1.40  | 2.47 | 2.05 | 1.48 | 1.83 | 2.86  | 1.09  | 3.40 | 0.51 | 2.97 |
| <b>CACNA2D2</b>                    |       |       |      |      |      |       |      |       |       |      |       |      |      |      |      |       |       |      |      |      |
| Reference<br>(untreated cell line) | 1.00  | 1.00  | 1.00 | 1.00 | 1.00 | 1.00  | 1.00 | 1.00  | 1.00  | 1.00 | 1.00  | 1.00 | 1.00 | 1.00 | 1.00 | 1.00  | 1.00  | 1.00 | 1.00 | 1.00 |
| 5-Aza-dC 1                         | 6.13  | 5.06  | 2.43 | 1.17 | 0.67 | 8.07  | 2.23 | 30.70 | 0.88  | 0.50 | 1.99  | 1.05 | 0.78 | 1.65 | 2.17 | 1.33  | 9.84  | 3.24 | 0.56 | 1.64 |
| 5-Aza-dC 2                         | 11.06 | 7.47  | 2.34 | 1.67 | 0.55 | 8.41  | 3.09 | 17.14 | 1.42  | 0.83 | 2.51  | 1.19 | 0.68 | 3.28 | 2.98 | 1.59  | 3.89  | 3.67 | 0.54 | 1.80 |
| TSA 1                              | 0.84  | 1.64  | 0.46 | 1.72 | 0.94 | 2.36  | 1.82 | 1.13  | 0.84  | 0.85 | 3.03  | 0.90 | 0.55 | 1.16 | 1.15 | 1.20  | 10.67 | 1.44 | 0.79 | 1.95 |
| TSA 2                              | 0.70  | 0.95  | 0.69 | 1.82 | 0.97 | 1.36  | 1.62 | 0.73  | 0.73  | 0.61 | 3.56  | 1.08 | 0.49 | 1.11 | 0.97 | 1.09  | 1.50  | 1.88 | 0.73 | 2.47 |
| 5-Aza-dC+TSA 1                     | 7.84  | 13.09 | 2.44 | 2.36 | 0.42 | 10.71 | 2.64 | 52.35 | 0.92  | 0.70 | 15.56 | 1.97 | 0.82 | 3.76 | 1.53 | 10.48 | 13.96 | 4.69 | 0.65 | 1.56 |
| 5-Aza-dC+TSA 2                     | 10.99 | 21.29 | 1.81 | 2.59 | 0.48 | 10.45 | 4.23 | 56.50 | 1.29  | 0.48 | 9.58  | 1.78 | 0.70 | 3.84 | 2.33 | 5.97  | 4.15  | 4.44 | 0.52 | 1.10 |

(5-Aza-dC) – treatment with 1  $\mu$ M of 5-Aza-2'-deoxycytidine (Sigma) for 96 hours ; (TSA) – treatment with 150 ng/mL of trichostatin A (Sigma) for 24 hours; (5-Aza-dC + TSA) – combined treatment with 1  $\mu$ M of 5-Aza-dC for 96 hours followed by an additional period of 24 hours with 150 ng/mL of TSA.

## Supplementary Material

**Table 2.** Primers sequences used for High Resolution Melting (HRM), Chromatin Immunoprecipitation (ChIP) and Copy Number Analysis.

| GENES                                                                | FORWARD (5'-3')             | REVERSE (5'-3')          |
|----------------------------------------------------------------------|-----------------------------|--------------------------|
| <b>High Resolution Melting (HRM) Analysis</b>                        |                             |                          |
| <i>CACNA2D2</i>                                                      | AGGAGAGGTCGAGTTATCGTT       | CCATATTTCCATTCAAAATACGA  |
| <i>HYAL1</i>                                                         | TTAGTGTTGATAGCGTGGG         | TTTATAAAAAATCACCCCACC    |
| <i>RASSF1*</i>                                                       | GGGTTTTATAGTTTTTGTATTTAGGTT | AACTCAATAAACTCAAACCTCCCC |
| <i>TMEM115</i>                                                       | TGGTTTTTTGGGATTTGTAGTT      | AATCAAACCTAATCAACTCC     |
| <i>TUSC2</i>                                                         | TTTGTGGGATTTGGGATTT         | ACTACCATAACCTACCCCAAC    |
| <i>NPRL2</i>                                                         | TATGTTTGAATTGGTATTAAT       | CCCTCCCAACTAACTCTACT     |
| <i>ZMYND10</i>                                                       | GAAAGCGTTGGGAATTTAAATATT    | CCCGCCCCTAAAAATAACTC     |
| <b>Chromatin Immunoprecipitation (ChIP) and Copy Number Analysis</b> |                             |                          |
| <i>RASSF1**</i>                                                      | TGGGGTGTGAGGAGGGGACGA       | AGAGCCGCGCAATGGA         |
| <i>TMEM115</i>                                                       | CCAGACCACGGAGGTTCTGT        | CTCTAGCCCCCACACTTGCT     |
| <i>TUSC2</i>                                                         | TAGGCCCTGAAGTGCAGGTT        | CTCCCGGTCTTTTGGGTGTA     |
| <i>NPRL2</i>                                                         | GGCGCAAAGCCATGTAAGAC        | CCGCAGCAGGGAACTACAAT     |
| <i>ZMYND10</i>                                                       | GGGACGCGAGAAATAGAGGAA       | TCTGTCCTCAGACGCCAAGTC    |
| <i>GAPDH**</i>                                                       | TACTAGCGGTTTTACGGGCG        | TCGAACAGGAGGAGCAGAGAGCGA |

\* Di GIOIA S, BIANCHI P, DESTRO A, et al. Quantitative evaluation of RASSF1A methylation in the non-lesional, regenerative and neoplastic liver. BMC Cancer. 2006; 6:89-101.

\*\* KAWAMOTO K, OKINO ST, PLACE RF, et al. Epigenetic modifications of RASSF1A gene through chromatin remodeling in prostate cancer. Clin Cancer Res 2007; 13:2541-8.
